# Supplementary material for: Stepping towards highly flexible aptamers: enzymatic recognition studies of unlocked nucleic acid nucleotides
Source: Royal Society of Chemistry journal article supplement (doi:10.1039/c2cc31316b), 2012-01-01
Supplement: c2cc31316b.pdf [file c2cc31316b.pdf]

## Stepping Towards Highly Flexible Aptamers: Enzymatic Recognition Studies of Unlocked Nucleic Acid Nucleotides

Camille Dubois, Meghan A. Campbell, Stacey Edwards, Jesper Wengel and Rakesh N. Veedu\*

### Additional Gel images:

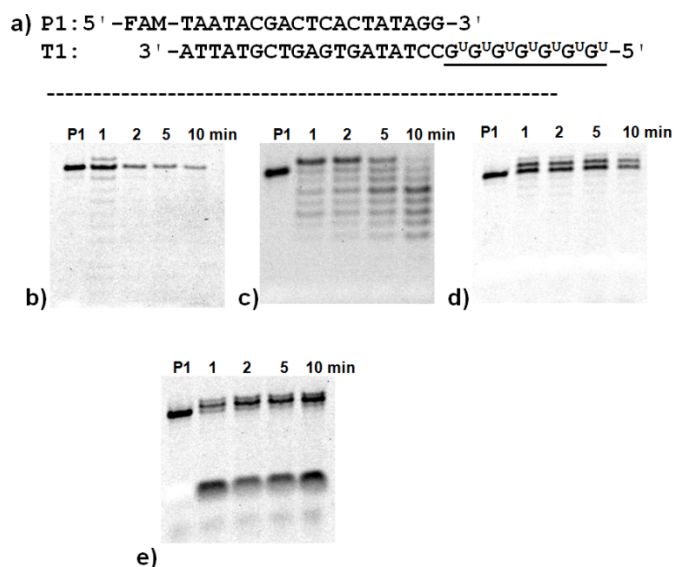

**Figure S1.** Reading of UNA-G nucleotides by polymerases. a) Primer P1 and template T1 sequences; b) KOD DNA polymerase; c) Phusion DNA polymerase; d) Klenow DNA polymerase; e) Taq DNA polymerase.

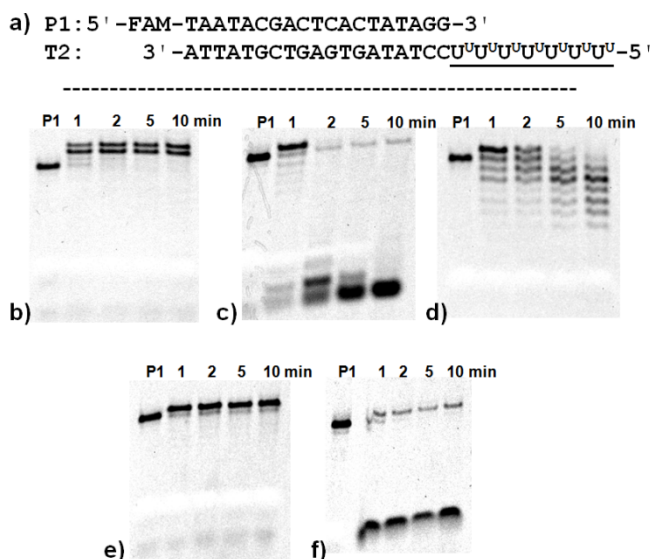

**Figure S2.** Reading of UNA-U nucleotides by polymerases. a) Primer P1 and template T2 sequences; b) Terminator DNA polymerase; c) KOD DNA polymerase; d) Phusion DNA polymerase; e) Klenow DNA polymerase; f) Taq DNA polymerase.

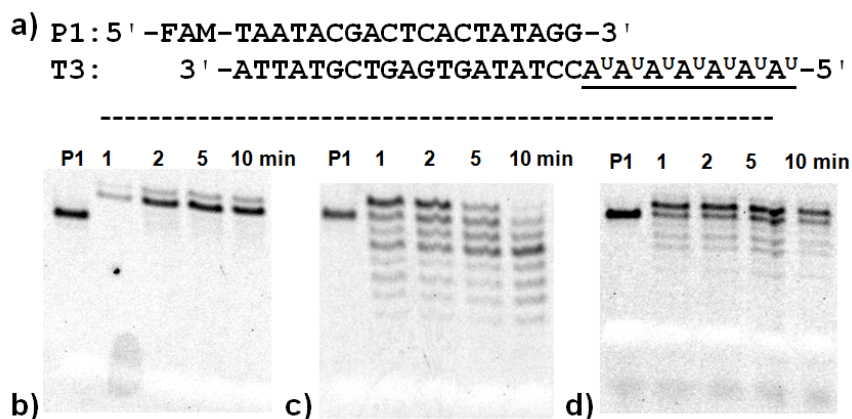

**Figure S3.** Reading of UNA-A nucleotides by polymerases. a) Primer P1 and template T3 sequences; b) Terminator DNA polymerase; c) Phusion DNA polymerase; d) Klenow DNA polymerase.

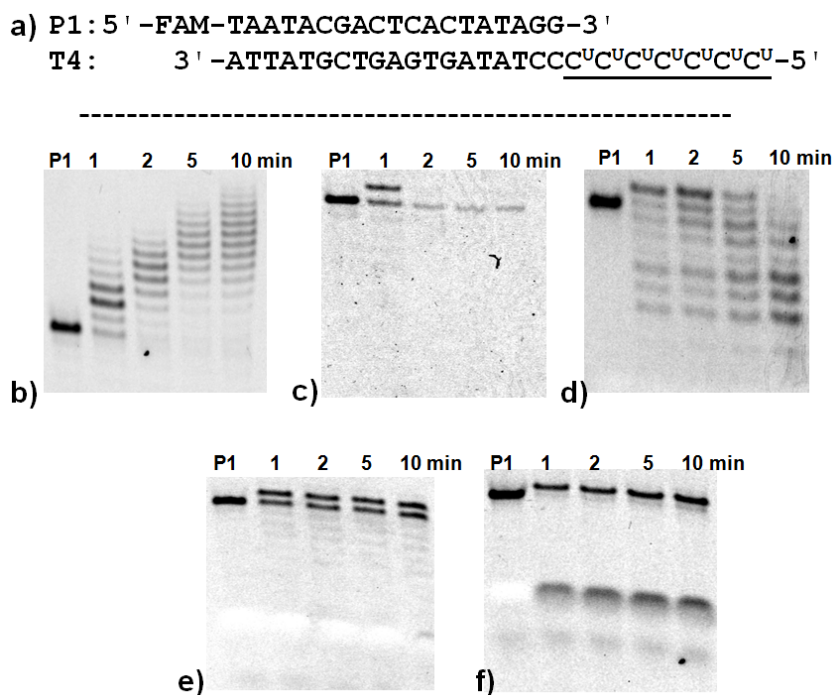

**Figure S4.** Reading of UNA-C nucleotides by polymerases. a) Primer P1 and template T4 sequences; b) Terminator DNA polymerase; c) KOD DNA polymerase; d) Phusion DNA polymerase; e) Klenow DNA polymerase; f) Taq DNA polymerase.

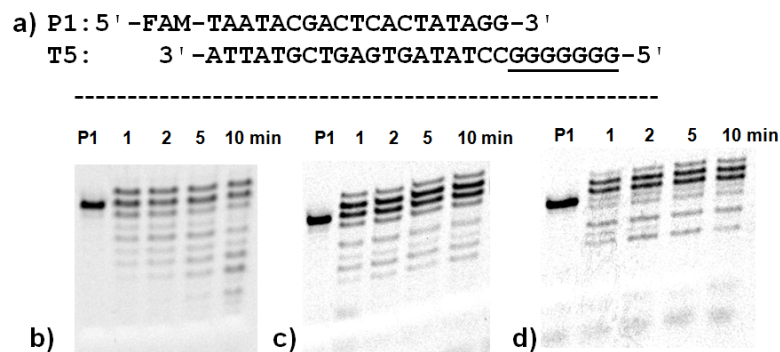

**Figure S5.** Incorporation of UNA nucleotides by polymerases. a) Primer P1 and template T5 sequences; b) KOD DNA polymerase; c) Phusion DNA polymerase; d) Klenow DNA polymerase.

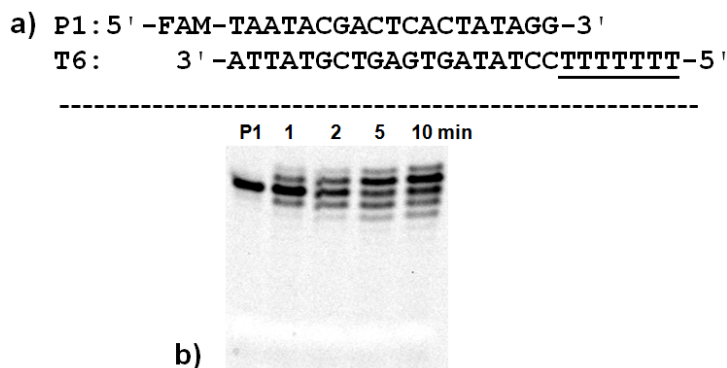

**Figure S6.** Incorporation of UNA nucleotides by polymerases. a) Primer P1 and template T6 sequences; b) Terminator DNA polymerase.

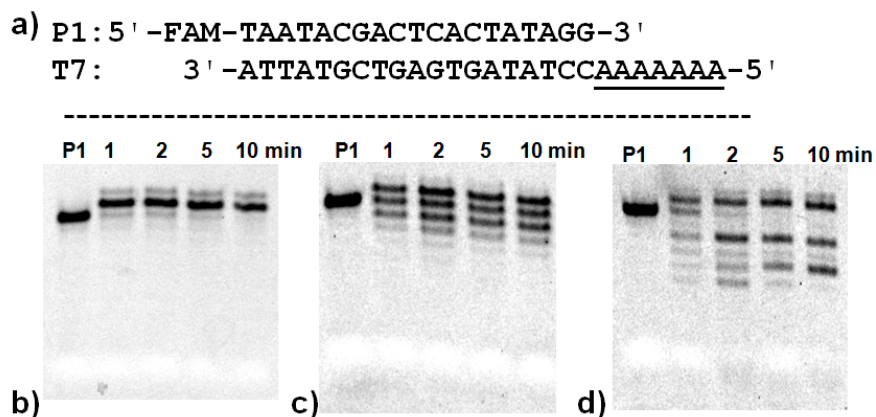

**Figure S7.** Incorporation of UNA nucleotides by polymerases. a) Primer P1 and template T7 sequences; b) Terminator DNA polymerase; c) Phusion DNA polymerase; d) Klenow DNA polymerase.

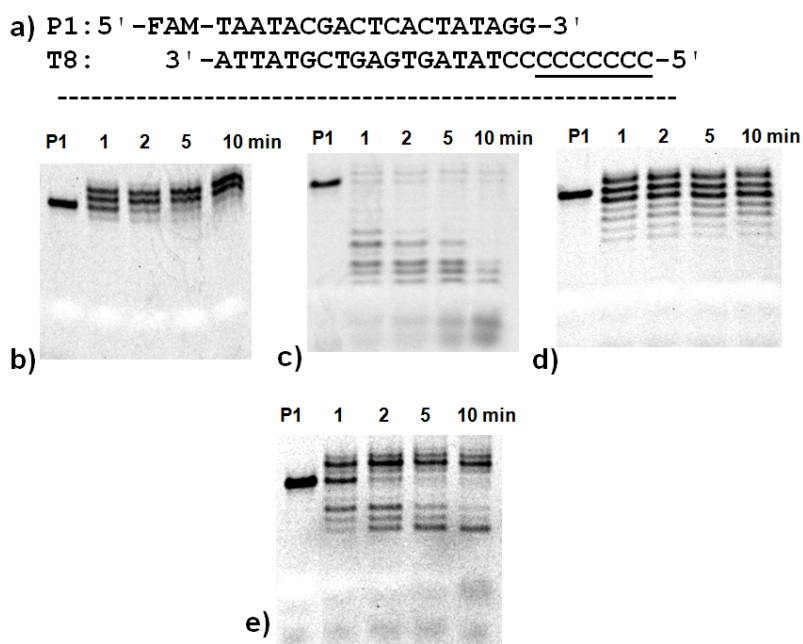

**Figure S8.** Incorporation of UNA nucleotides by polymerases. a) Primer P1 and template T8 sequences; b) Therminator DNA polymerase; c) KOD DNA polymerase; d) Phusion DNA polymerase; e) Klenow DNA polymerase.

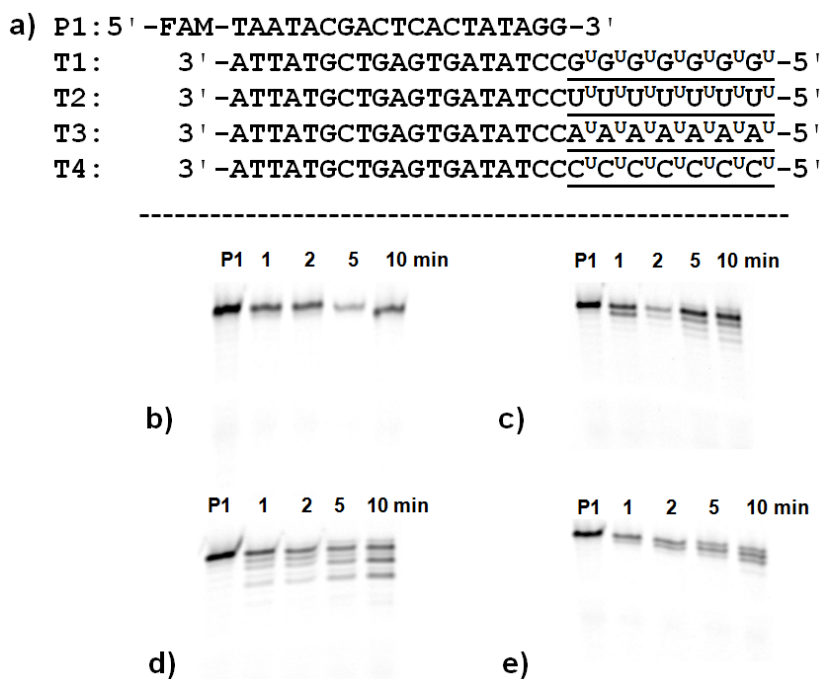

**Figure S9.** Fidelity of reading UNA-nucleotides by Therminator DNA polymerase. a) Primer P1 and template sequences; b) with template T1 and dGTP instead of dCTP; c) with template T2 and dTTP instead of dATP; d) with template T3 and dATP instead of dTTP; e) with template T4 and dCTP instead of dGTP.

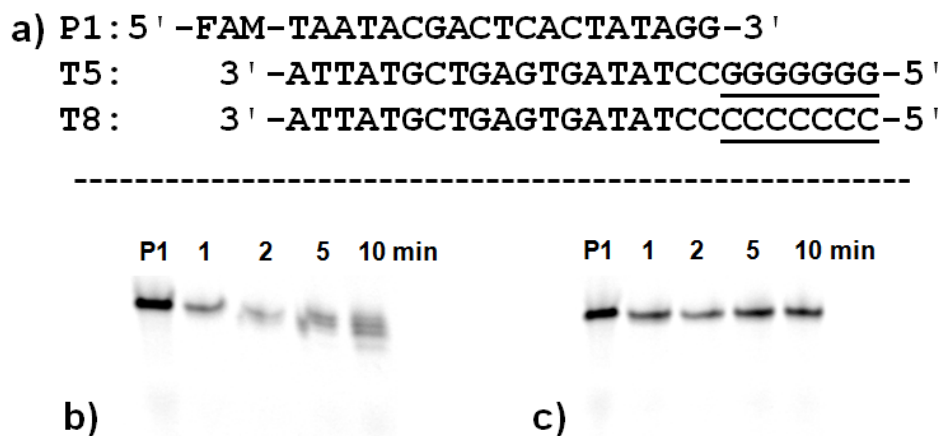

**Figure S10.** Fidelity of UNA-nucleotide incorporations by Terminator DNA polymerase. a) Primer P1 and template sequences; b) with template T5 and UNA-GTP instead of UNA-CTP; c) with template T8 and UNA-CTP instead of UNA-GTP.

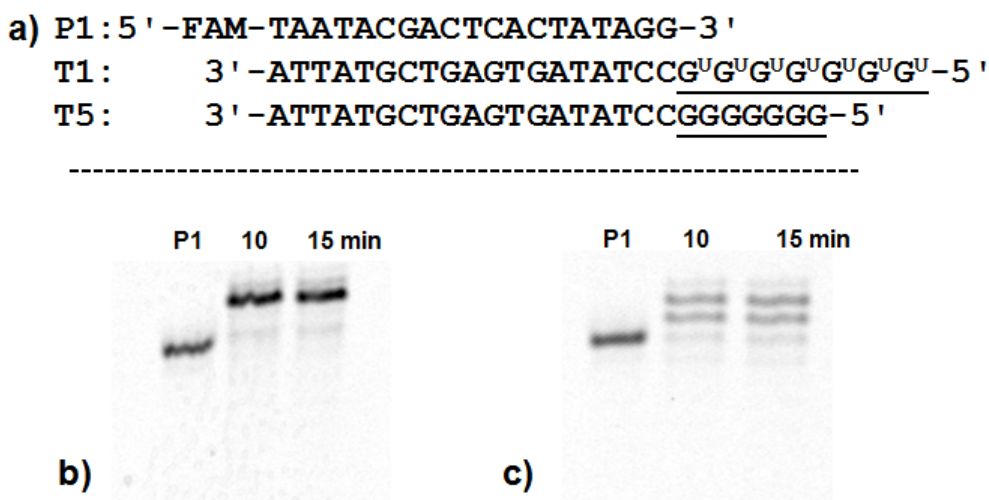

**Figure S11.** UNA-nucleotide reading and incorporations by Terminator DNA polymerase without supplementing MnCl<sub>2</sub>. a) Primer P1 and template sequences T1 (for reading) and T5 (for incorporation); b) Incorporation of dC opposite to UNA-G; c) Incorporation of UNA-C opposite to dG of the template strand.

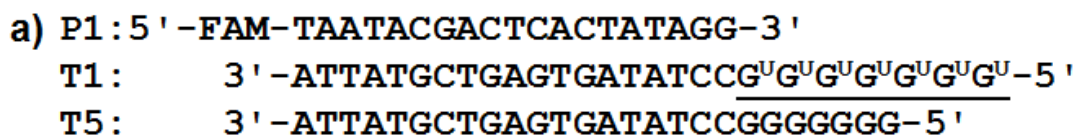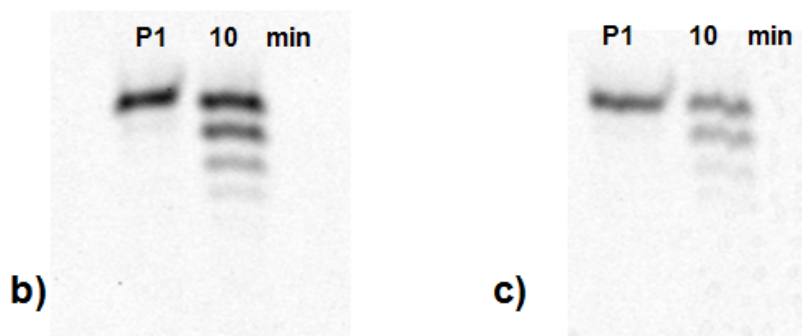

**Figure S12.** UNA nucleotide reading and incorporations by Terminator DNA polymerase without adding any nucleoside triphosphates. a) Primer P1 and template sequences; b) With template T1; c) With template T5.

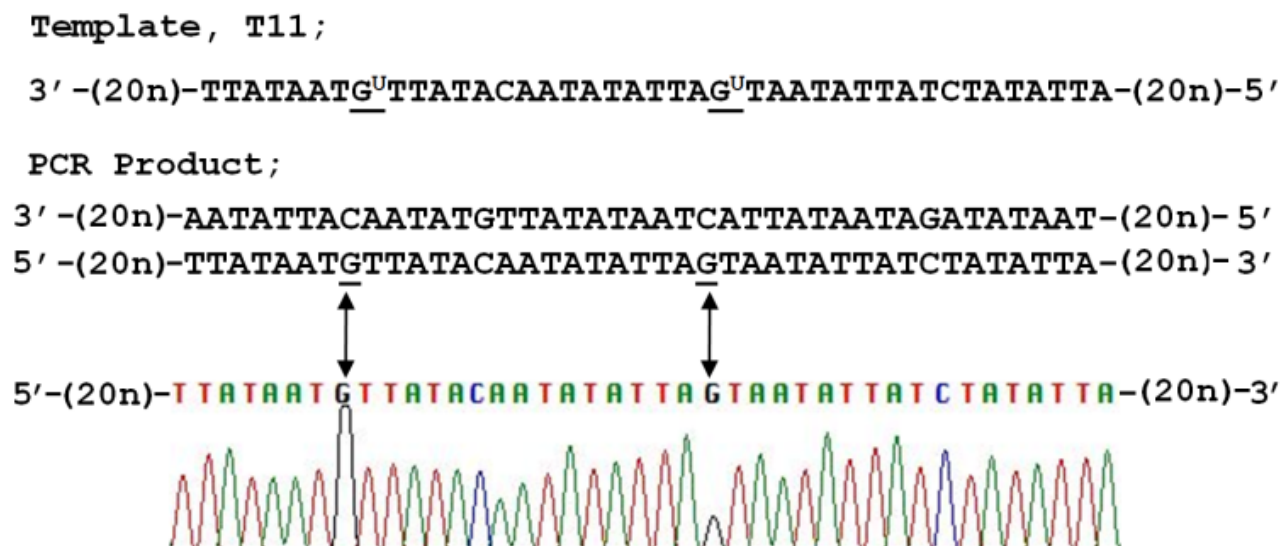

**Figure 3.** PCR product sequence aligned with the sequencing chromatogram. Positions of DNA-G in the expected positions in the PCR product are underlined, as confirmed by the G nucleotides identified in the sequencing chromatogram.



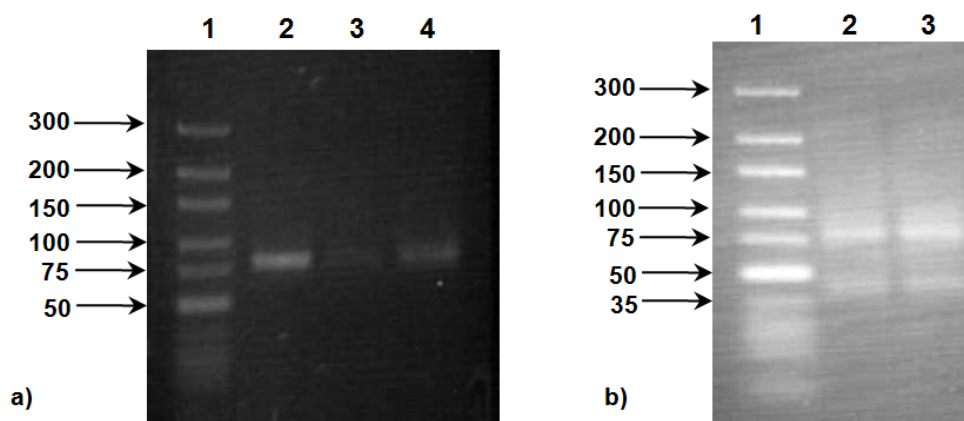

**Figure S14.** PCR amplification using UNA-modified DNA templates. a) By Phusion DNA polymerase, lane 1: DNA size marker, lane 2: Using template T9, lane 3: Using template T10, lane 4: Using template T11; b) By Therminator DNA polymerase. Lane 1: DNA marker, lane 2: Using template T11 with annealing temperature 45 °C, lane 3: Using template T11 with annealing temperature 48 °C.

### **Experimental Section**

**Synthesis of UNA oligonucleotides:** Templates containing UNA nucleotides were synthesized on an Expedite DNA synthesizer via standard phosphoramidite chemistry in 0.2  $\mu\text{mol}$  scale. The synthesized oligonucleotides were deprotected and cleaved from the solid support by treatment with  $\text{NH}_4\text{OH}$  at 55 °C overnight. The crude oligonucleotides were then purified by RP-HPLC and desalted, prior to use in the enzymatic reactions. UNA phosphoramidites are commercially available from RiboTask ApS.

**Synthesis of UNA nucleoside 5'-triphosphates:** UNA triphosphates were synthesized according to a published procedure.<sup>1</sup>

**General procedure for primer extension reactions:** 5'-FAM labelled primer sequence (purchased from IDT, Coralville, Iowa) was annealed to the templates T1-T11 by mixing primer and template in a molar ratio of 1:2 and heating to 80 °C for 3 min, followed by slow cooling to room temperature. The extension reaction mixtures were prepared in a total volume of 20  $\mu\text{L}$  containing 1 $\times$  reaction buffer specific to each polymerase, 2.5 mM  $\text{MnCl}_2$ , 500  $\mu\text{M}$  of dNTP/ 750  $\mu\text{M}$  of UNA-NTP, 3:6 pmol ratio of the annealed primer–template complex and 2.5 U of the DNA polymerase. The reaction mixtures were gently vortexed and incubated at 74 °C. The reactions were monitored by taking out 2.5  $\mu\text{L}$  of the reaction mixture at 1, 2, 5 and 10 minutes of incubation. The polymerase reactions were quenched by

the addition of an equal volume of loading buffer (8 M urea in 1 × TBE containing 0.05% bromophenol blue). Analysis of the products was performed by 13% 7M urea polyacrylamide gel electrophoresis in the presence of TBE buffer (100 mM Tris, 90 mM Boric acid, 1 mM EDTA) at pH 8.4 followed by fluorescence scanning with an Amersham Typhoon.

**General procedure for polymerase chain reaction (PCR):** The PCR reaction mixture was prepared in a total volume of 50 μL containing 1× reaction buffer specific to each polymerase, 1 mM MgCl<sub>2</sub>, 250 μM of dNTPs, 1.5 μM of both forward and reverse primers, 10 nM of UNA-modified DNA template or library and 2.5 U of the DNA polymerase. The reaction mixtures were gently vortexed and then amplified using a thermal cycler (Bio-Rad S-1000). A 25-cycle PCR protocol consisted of three steps, denaturation at 95 °C for 15 second, annealing at 45-48 °C for 10 seconds and extension at 72 °C for 30 seconds. After the polymerase reactions, gel-loading buffer (50% glycerol, 0.05% bromophenol blue, 0.05% xylene cyanol and 10mM EDTA) was added (7.5 μL) and the products were analyzed by 3% agarose gel electrophoresis followed by UV-photography.

**Cloning and Sequencing:** Purified PCR products (50ng) were cloned into pCR-Blunt (Invitrogen) according to the manufacturer's instructions. Plasmid DNA was extracted using QIAprep (Qiagen) and sequenced by the Australian Genome Research Facility (AGRF, Brisbane, Australia).

### **References:**

1. R. N. Veedu, H. V. Burri, P. Kumar, P. K. Sharma, P. J. Hrdlicka, B. Vester, J. Wengel, *Bioorg. Med. Chem. Lett.*, 2010, **20**, 6565.
